# Supplementary material for: Carbon Neutrality by 2060 Is Critical for Survival of Tibetan Plateau’s Largest Glacier
Source: Research Square preprint supplement (doi:10.21203/rs.3.rs-7728346/v1), 2025-09-30
Supplement: Supplementary file 1 [file 394af1697ad0deedb7010222.docx]

**nature climate change**

**Brief Communication**

**Carbon Neutrality by 2060 Is Critical for Survival of Tibetan Plateau’s Largest Glacier**

**Contents:**

Supplementary Figure 1: Flowchart of methodology.

Supplementary Figure 2: Observed global, TP and PIF temperature rising since 1940.

Supplementary Figure 3: Observed global, TP and PIF temperature rising with 11-year centered rolling mean since 1940.

Supplementary Figure 4: PIF temperature and precipitation variation relative to baseline (2000–2014) under different SSPs.

Supplementary Figure 5: Annual variation of PIF from 2000 to 2300 under different SSPs.

Supplementary Figure 6: Annual variation of PIF from the carbon neutrality to 2300 under different CNs.

Supplementary Figure 7: Spatial distribution variation of PIF under SSP2-4.5 (top) and SSP5-8.5 (bottom).

Supplementary Figure 8: Model performance validation with remote sensing DEM difference.

**Supplementary Table 1: Ice velocity validation of multi-period.**

**Supplementary Table 2: Bias correction assessment of CMIP6 temperature (2000–2014)**

**Supplementary Table 3: Bias correction assessment of CMIP6 precipitation (2000–2014).**

**Supplementary Table 4:Bias correction assessment of CMIP6 wind (2000–2014).**

**Supplementary Table 5: Bias correction assessment of CMIP6 relative humidity (2000–2014).**

### Fig. S1


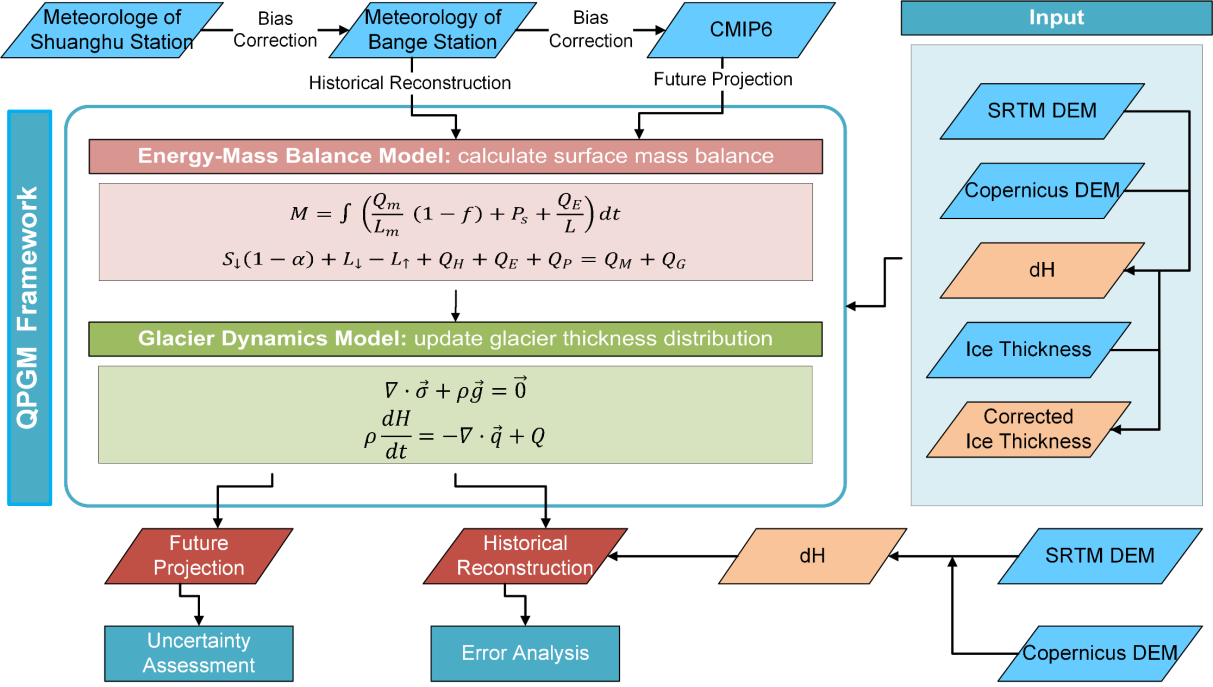


Supplementary Figure 1. Flowchart of methodology.

### Fig. S2

(A) Global and TP


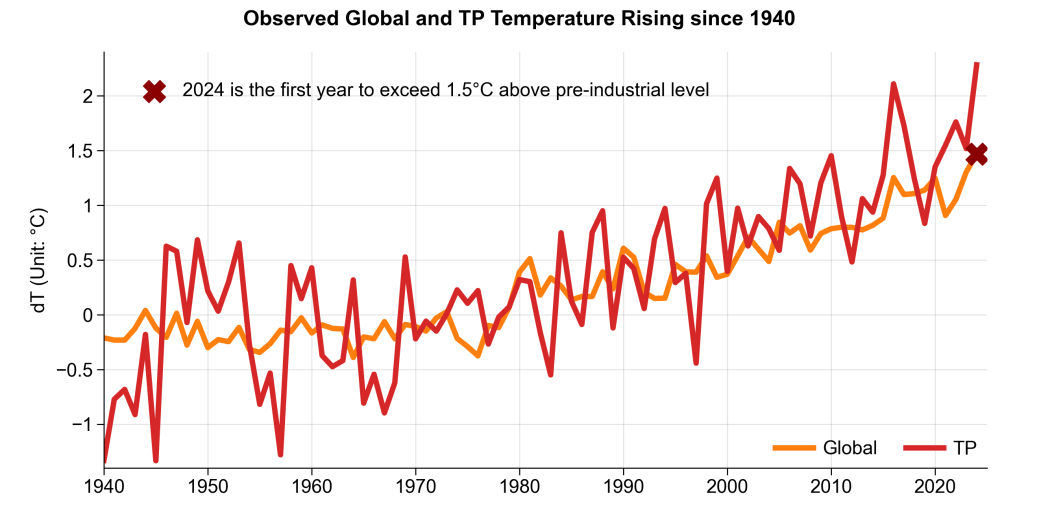


(B) Global and PIF


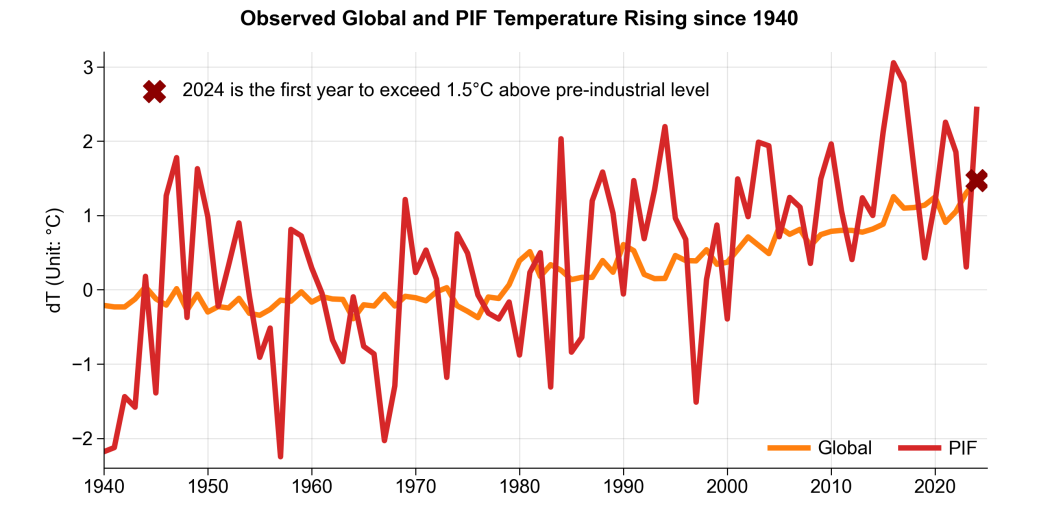


**(C) Global and TP with 21-year centered rolling mean**


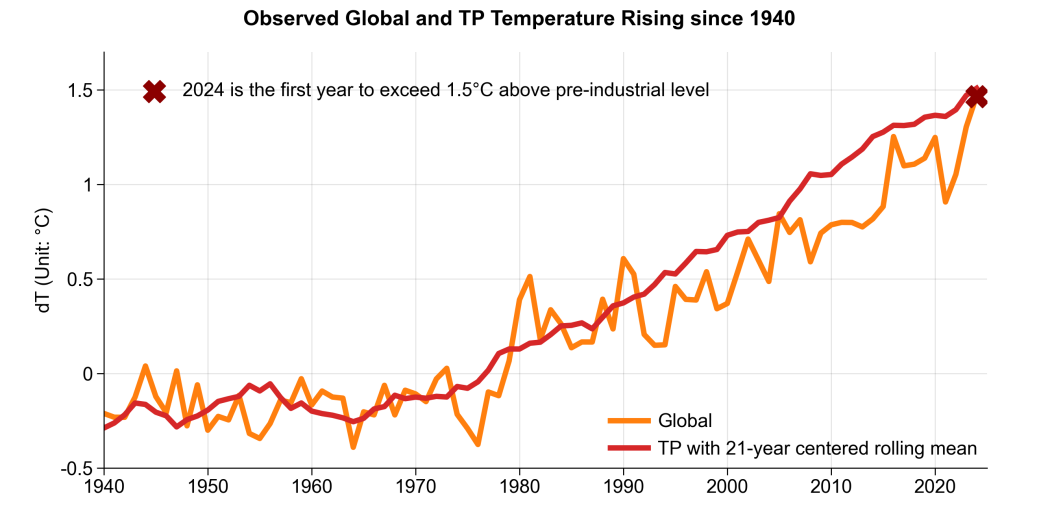


(D) Global and PIF with 21-year centered rolling mean


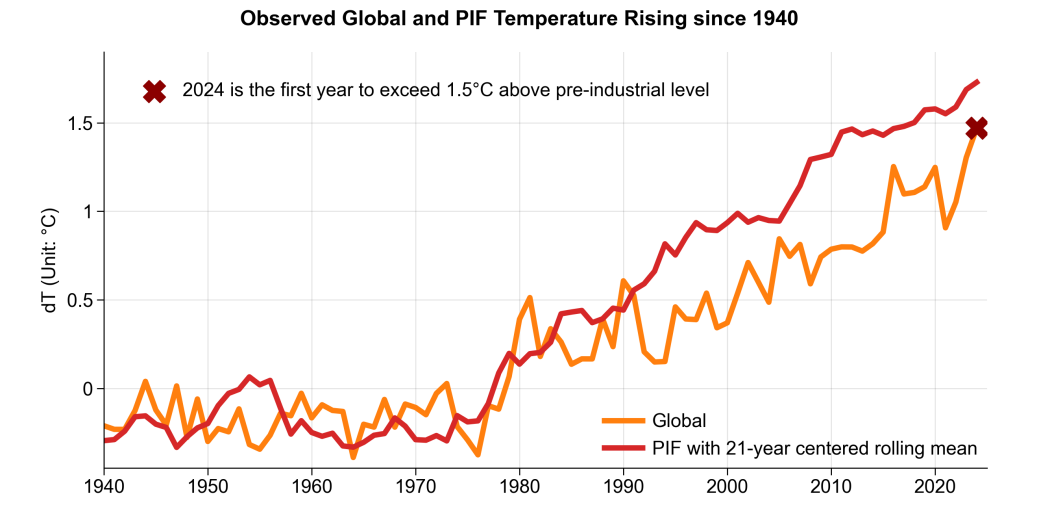


Supplementary Figure 2. Observed global, TP and PIF temperature rising since 1940.

### Fig. S3


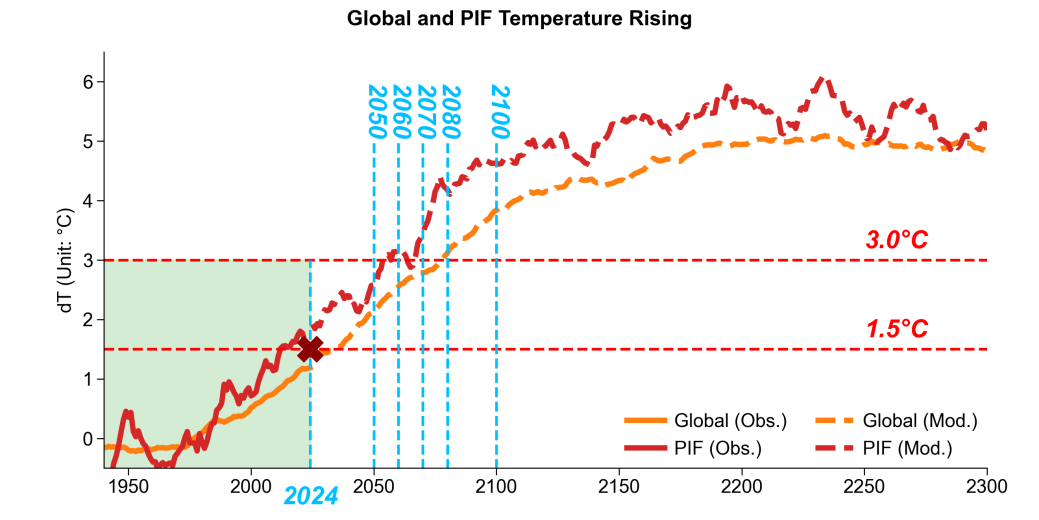


Supplementary Figure 3. Observed global, TP and PIF temperature rising with 11-year centered rolling mean since 1940 under SSP2-4.5.

### Fig. S4

(A) Delta temperature relative to baseline (2000–2014)


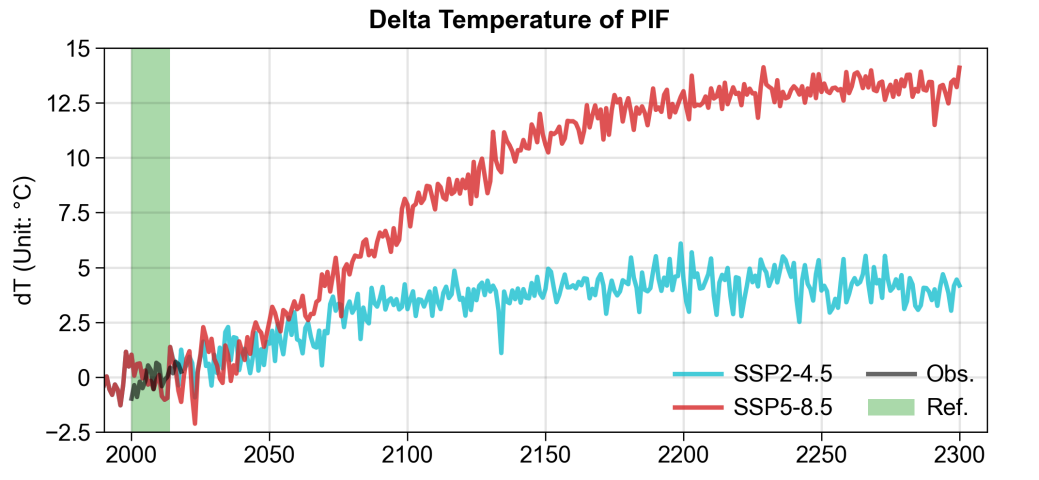


(B) Delta precipitation relative to baseline (2000–2014)


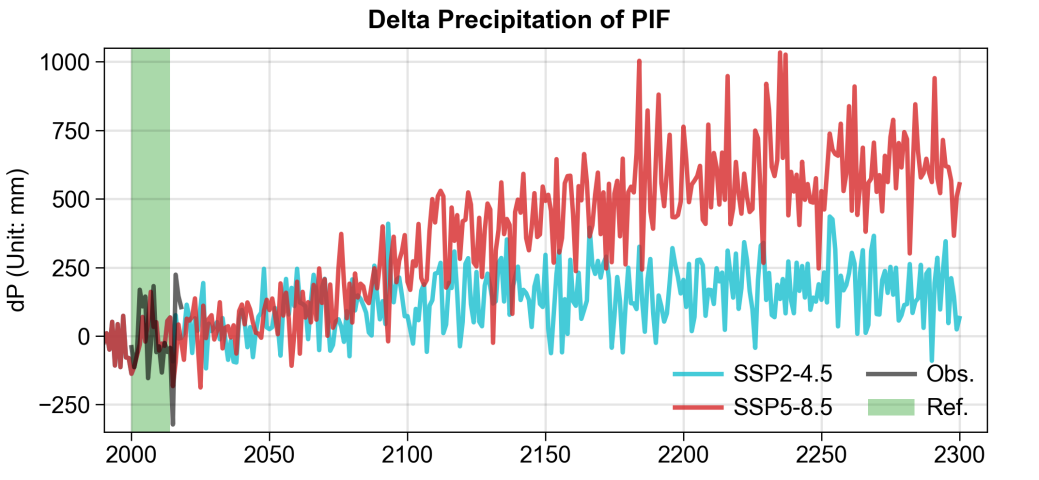


Supplementary Figure 4. PIF temperature and precipitation variation relative to baseline (2000–2014) under different SSPs.

### Fig. S5

(A) Annual mass loss of PIF during 2000–2300


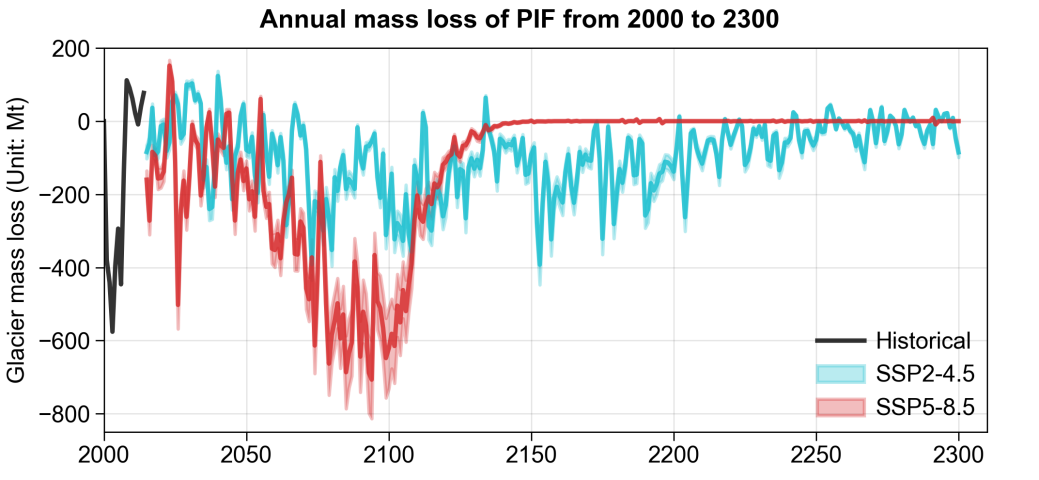


(A) Annual area loss of PIF during 2000–2300


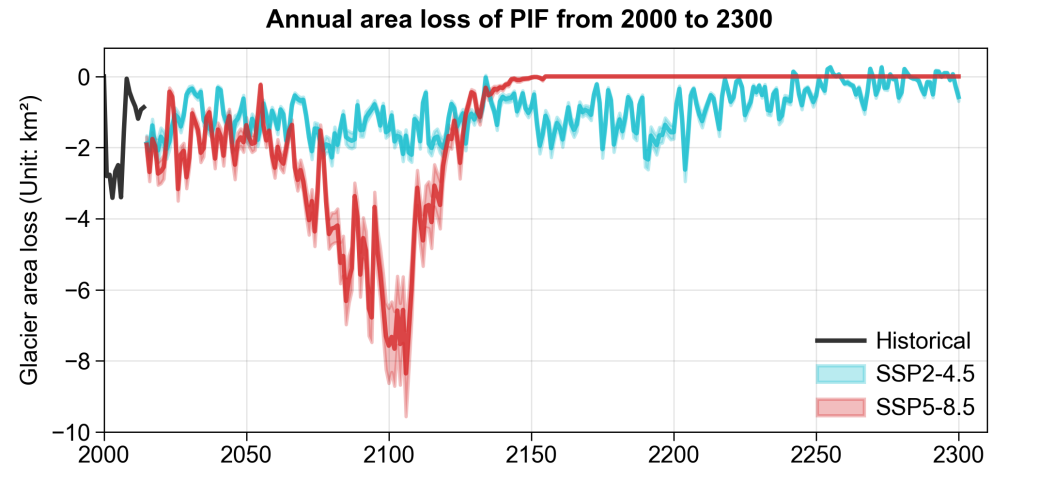


Supplementary Figure 5. Annual variation of PIF from 2000 to 2300 under different SSPs.

### Fig. S6


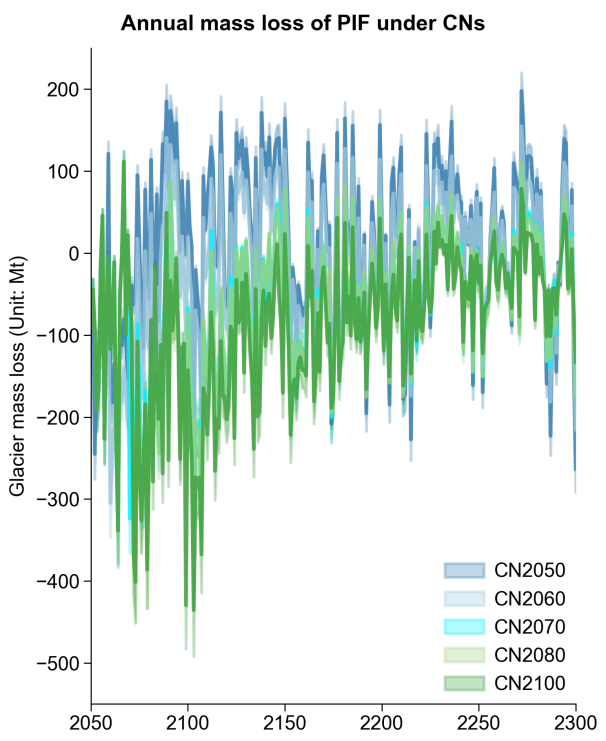

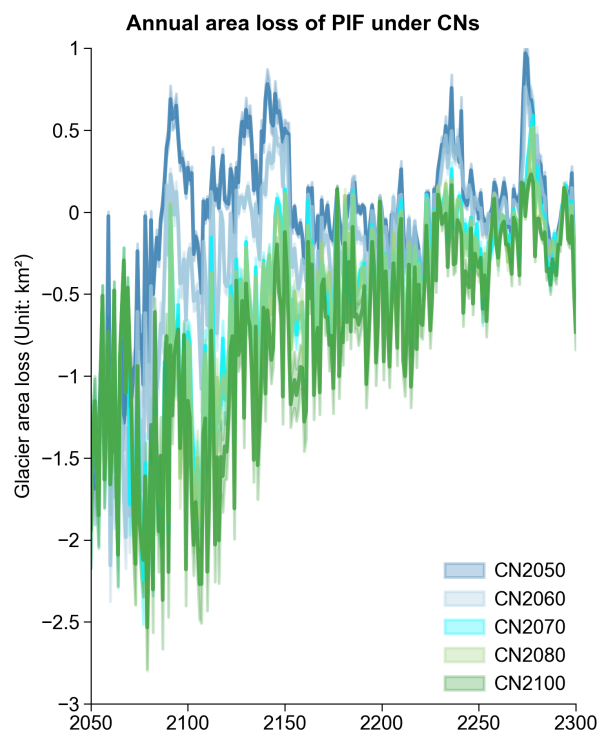


Supplementary Figure 6. Annual variation of PIF from the carbon neutrality to 2300 under different CNs.

### Fig. S7


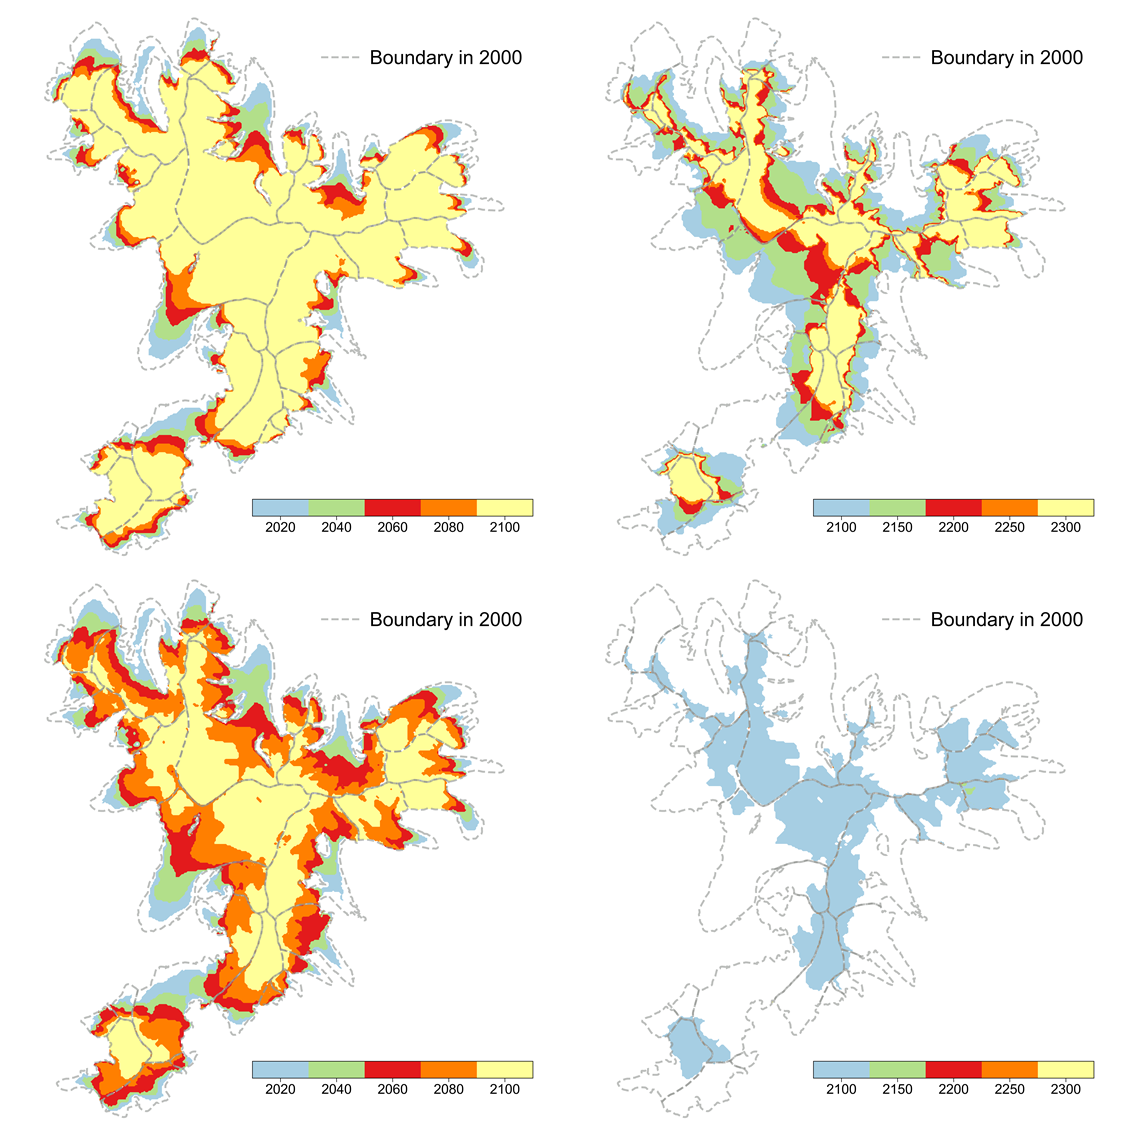


Supplementary Figure 7. Spatial distribution variation of PIF under SSP2-4.5 (top) and SSP5-8.5 (bottom).

### Fig. S8


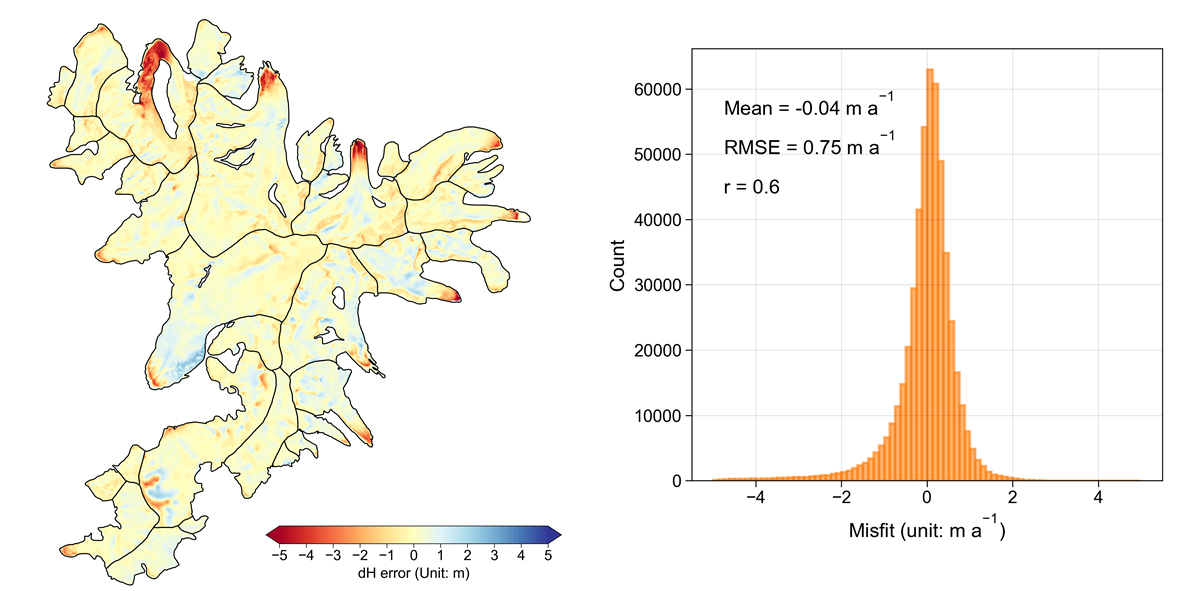


Supplementary Figure 8. Model performance validation with remote sensing DEM difference.

### Table. S1

| **Table. S1. Ice velocity validation of multi-period.** | | |
| --- | --- | --- |
| Period | Mean velocity (m a-1) | Max velocity (m a-1) |
| 2009.1–2009.3 | 1.81 | 15.01 |
| 2009 | 1.82 | 15.01 |
| 2000–2009 | 1.85 | 18.45 |
| 2000–2018 | 1.80 | 15.86 |

### Table. S2

| **Table. S2. Bias correction assessment of CMIP6 temperature (2000–2014).** | | | |
| --- | --- | --- | --- |
| Index | Observation/K | Origin/K | Corrected/K |
| Mean | -8.5 | -1.8 | -1.8 |
| Std | 8.5 | 6.8 | 6.9 |
| Min | -25.1 | -14.9 | -15.1 |
| 25% | -16.0 | -8.1 | -7.8 |
| 50% | -9.7 | -2.0 | -2.2 |
| 75% | -0.6 | 4.8 | 5.0 |
| Max | 5.0 | 8.9 | 8.9 |

### Table. S3

| **Table. S3. Bias correction assessment of CMIP6 precipitation (2000–2014).** | | | |
| --- | --- | --- | --- |
| Index | Observation/mm | Origin/mm | Corrected/mm |
| Mean | 40.5 | 46.1 | 46.1 |
| Std | 37.9 | 62.7 | 56.7 |
| Min | 0.7 | 0 | 0 |
| 25% | 7.9 | 2.1 | 2.0 |
| 50% | 22.3 | 9.5 | 14.6 |
| 75% | 69.4 | 77.2 | 80.9 |
| Max | 132.0 | 270.3 | 206.0 |

### Table. S4

| **Table. S4. Bias correction assessment of CMIP6 wind (2000–2014).** | | | |
| --- | --- | --- | --- |
| Index | Observation/ms-1 | Origin/ms-1 | Corrected/ms-1 |
| Mean | 3.6 | 3.9 | 3.9 |
| Std | 1.4 | 0.9 | 1.0 |
| Min | 1.6 | 1.5 | 1.9 |
| 25% | 2.4 | 3.2 | 3.1 |
| 50% | 3.3 | 3.8 | 3.7 |
| 75% | 4.6 | 4.5 | 4.6 |
| Max | 7.3 | 7.8 | 7.0 |

### Table. S5

| **Table. S5. Bias correction assessment of CMIP6 relative humidity (2000–2014).** | | | |
| --- | --- | --- | --- |
| Index | Observation/% | Origin/% | Corrected/% |
| Mean | 48.9 | 43.2 | 43.2 |
| Std | 18.1 | 17.0 | 16.4 |
| Min | 18.2 | 14.4 | 15.9 |
| 25% | 33.0 | 28.6 | 27.8 |
| 50% | 49.0 | 42.0 | 43.5 |
| 75% | 66.5 | 59.1 | 59.0 |
| Max | 88.5 | 74.5 | 70.0 |
